# Supplementary material for: Enhanced photoreduction efficiency of Cr(vi) driven by visible light in a new Zr-based metal–organic framework modified by hydroxyl groups
Source: Royal Society of Chemistry journal article supplement (doi:10.1039/d4dt00505h), 2024-01-01
Supplement: d4dt00505h1.pdf [file d4dt00505h1.pdf]

## Supporting information

### **An enhanced photoreduction efficiency of Cr(VI) driven by visible light in a new Zr-based metal-organic framework modified by hydroxyl groups**

Duc T. Nguyen,<sup>a</sup> Khang M. V. Nguyen,<sup>a</sup> Huy K. Duong,<sup>a</sup> Binh T. Nguyen,<sup>a</sup> Mai D. K. Nguyen,<sup>a</sup> Dang B. Tran,<sup>a</sup> Quang-Hieu Tran,<sup>b</sup> Tan L. H. Doan<sup>c,d</sup> and My V. Nguyen<sup>\*a</sup>

<sup>a</sup> Faculty of Chemistry, Ho Chi Minh City University of Education, Ho Chi Minh City, 700000, Vietnam.

<sup>b</sup> Basic Sciences Department-Saigon Technology University, Ho Chi Minh City 700000, Vietnam, 180 Cao Lo, Ward 4, District 8, Ho Chi Minh City, Vietnam.

<sup>c</sup> Center for Innovative Materials and Architectures (INOMAR), Ho Chi Minh City, Vietnam.

<sup>d</sup> Vietnam National University, Ho Chi Minh City, Vietnam.

\*To whom correspondence should be addressed: [mynv@hcmue.edu.vn](mailto:mynv@hcmue.edu.vn)

## Section S1. Nuclear Magnetic Resonance (NMR) Spectroscopy

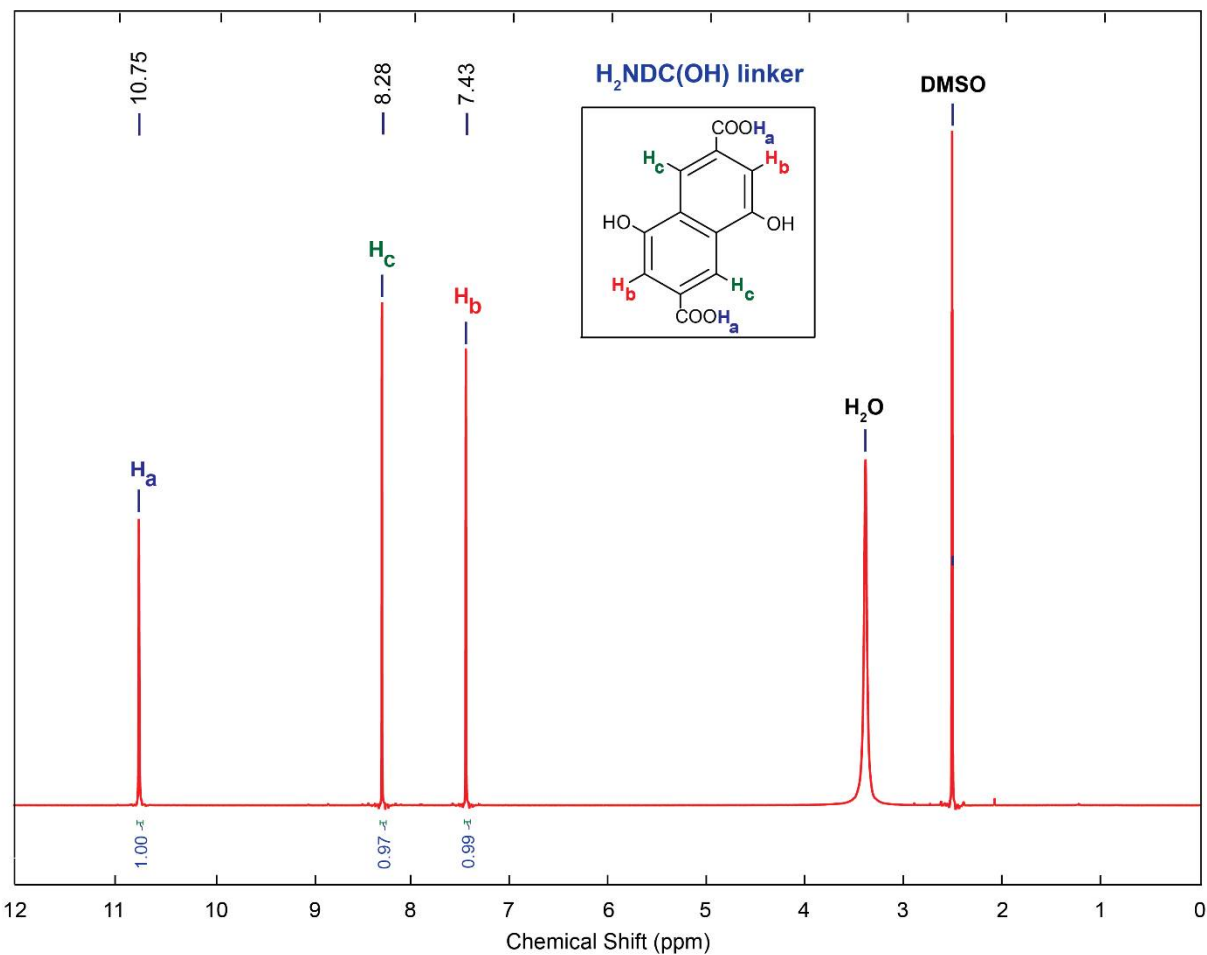

**Figure S1.**  $^1\text{H-NMR}$  spectrum of  $\text{H}_2\text{NDC(OH)}$  linker in DMSO solvent.

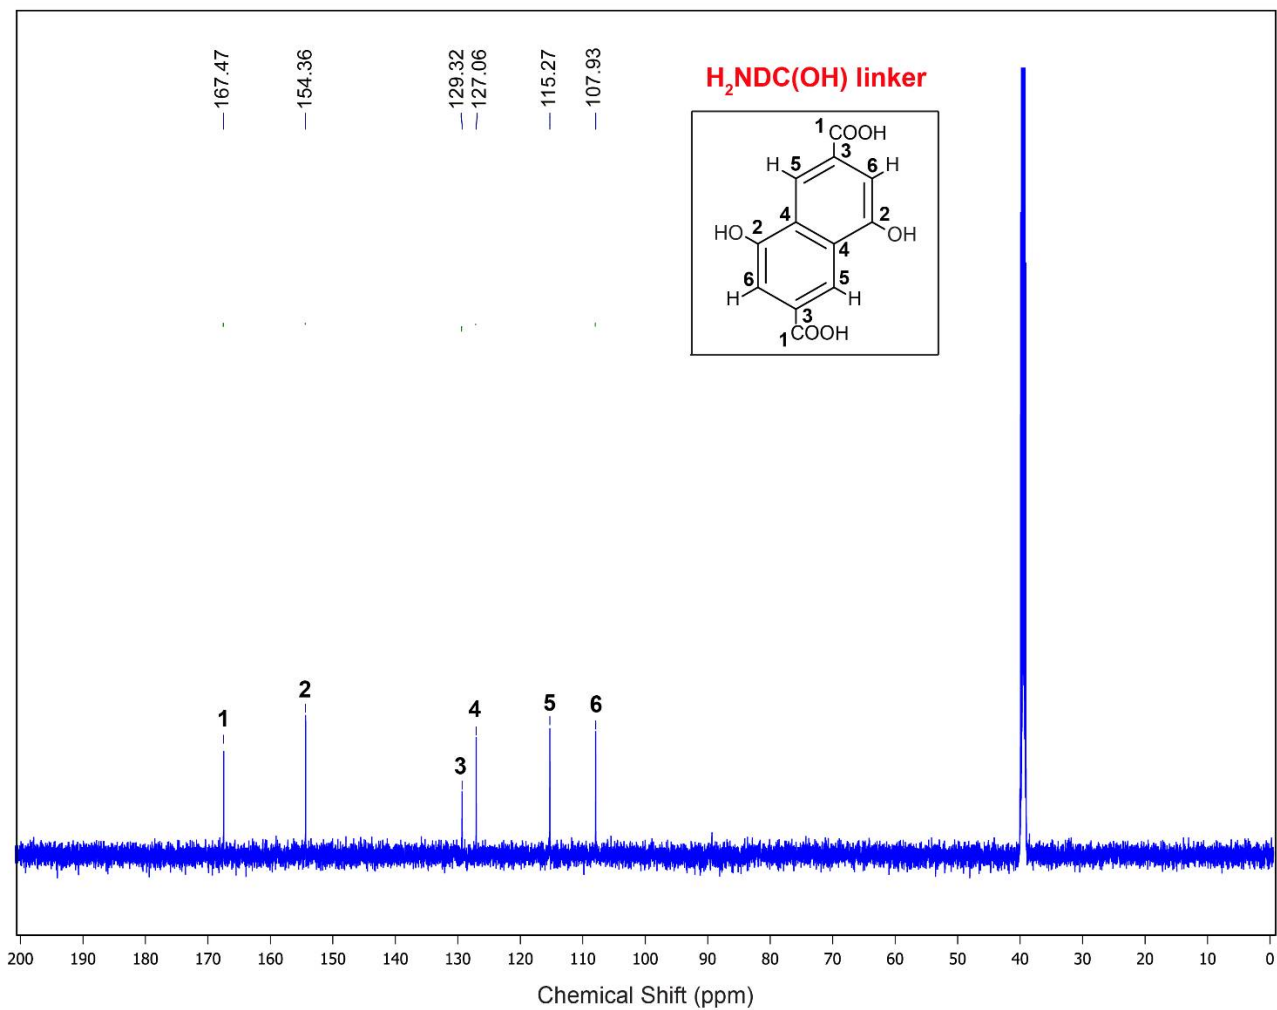

**Figure S2.**  $^{13}\text{C}$ -NMR spectrum of  $\text{H}_2\text{NDC(OH)}$  linker in DMSO solvent.

**Section S2.** The standard curve of Cr(VI)

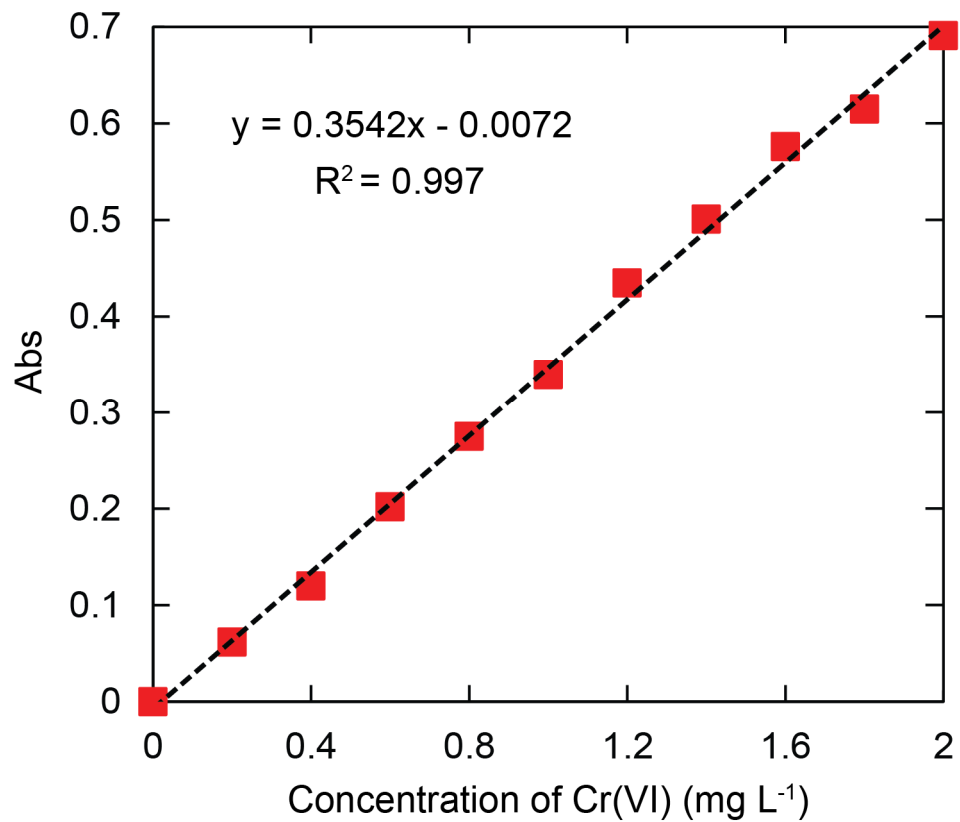

**Figure S3.** The relationship between the absorbed intensity of the Cr(VI) complex via the DPC method and the Cr(VI) different concentrations of 0 – 2 mg L<sup>-1</sup> by linear fitting.

### Section S3. Raman Spectroscopy

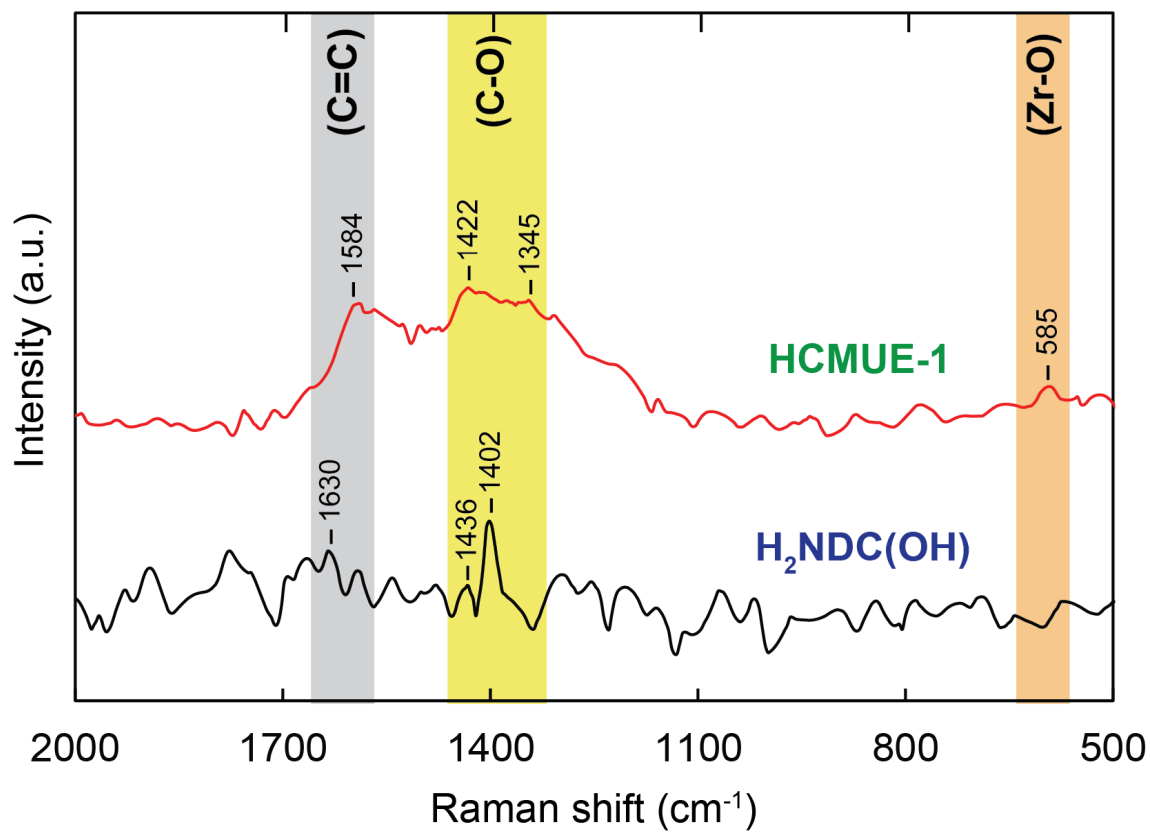

**Figure S4.** Raman spectrum of activated HCMUE-1 (red) in comparison with H<sub>2</sub>NDC(OH) linker (black).

#### Section S4. N<sub>2</sub> isotherm adsorption analysis at 77K

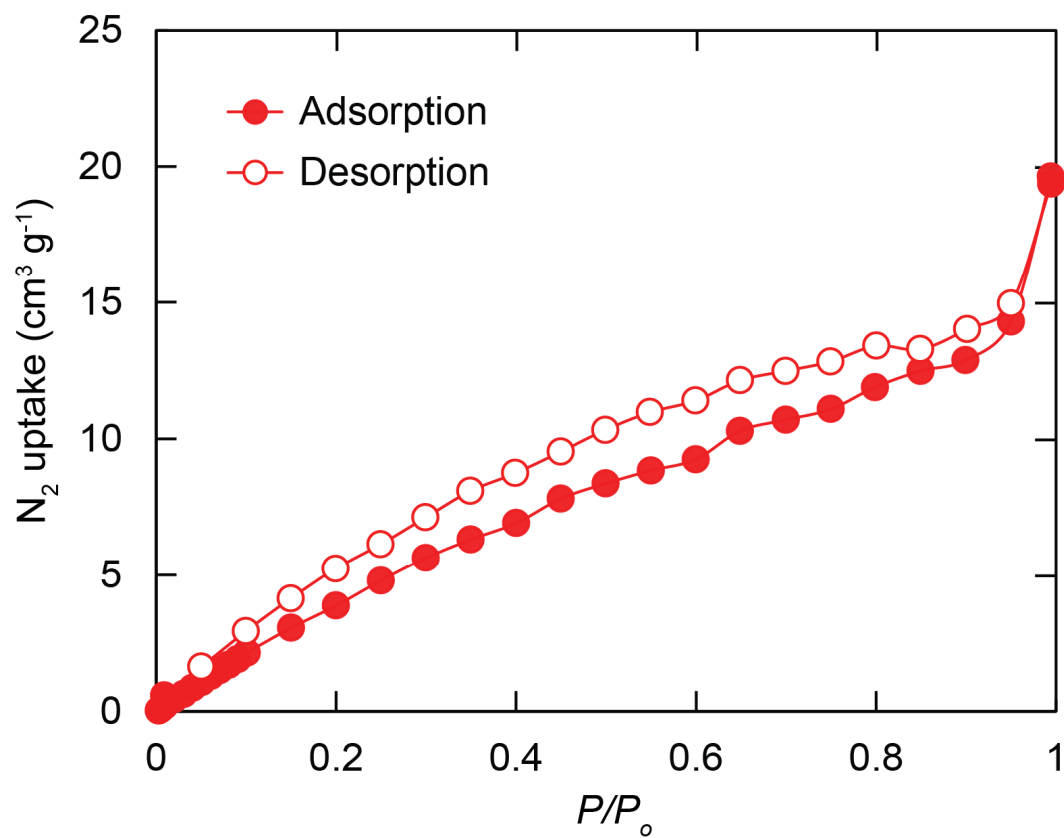

**Figure S5.** N<sub>2</sub> isotherm curve of HCMUE-1 material at 77K. The closed and open circles symbolize the adsorption and desorption branches of the isotherm, respectively.

## Section S5. XPS Spectroscopy

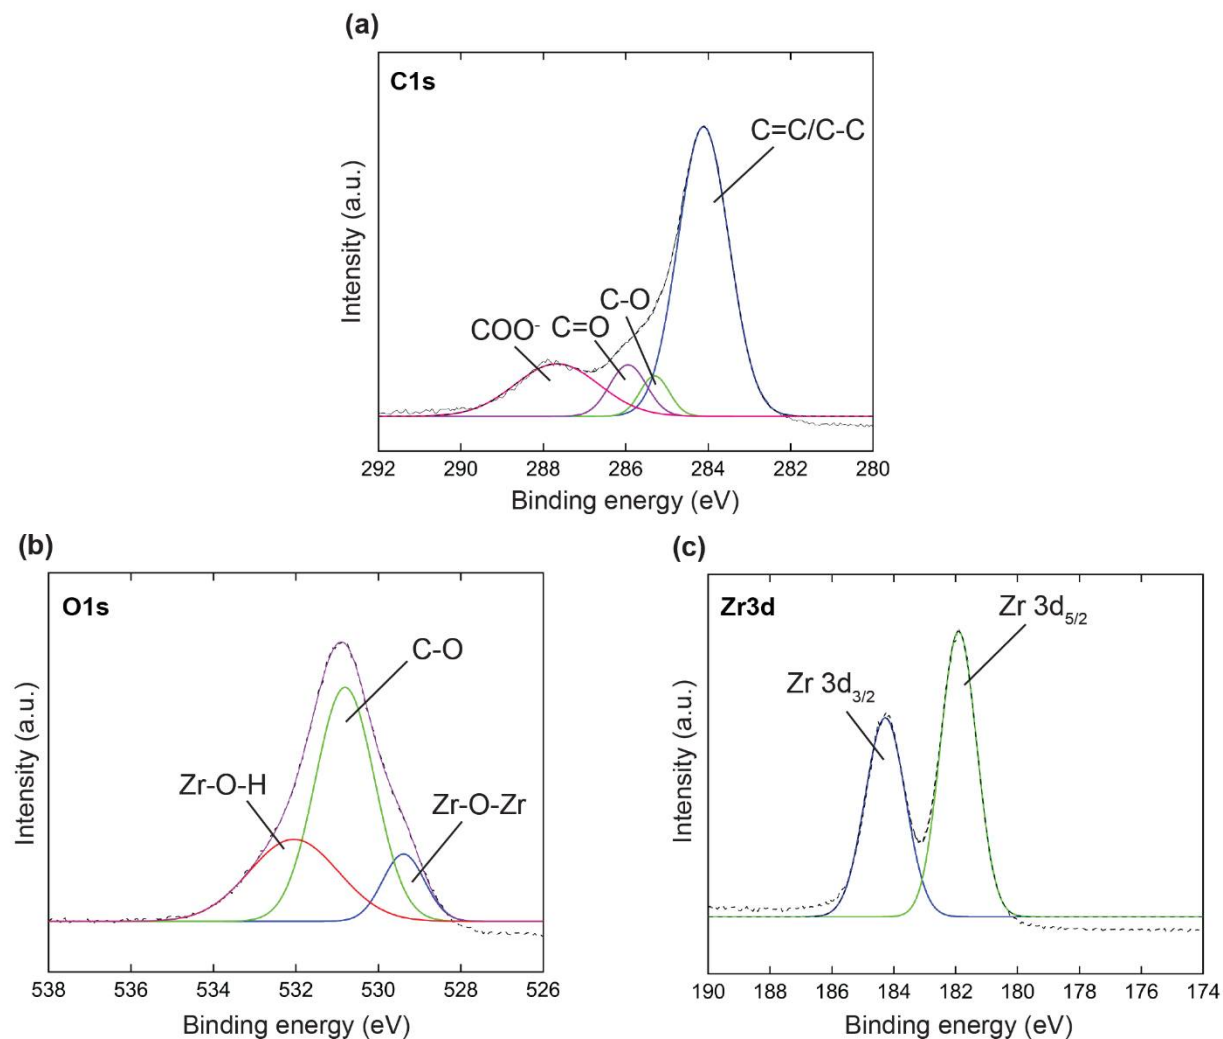

**Figure S6.** The XPS analysis of HCMUE-1 after photocatalysis: high-resolution spectrum of C 1s in HCMUE-1 (a); high-resolution spectrum of O 1s in HCMUE-1 (b); high-resolution spectrum of Zr 3d in HCMUE-1 (c).

**Section S6.** Photoluminescence spectra and time-resolved fluorescence analysis

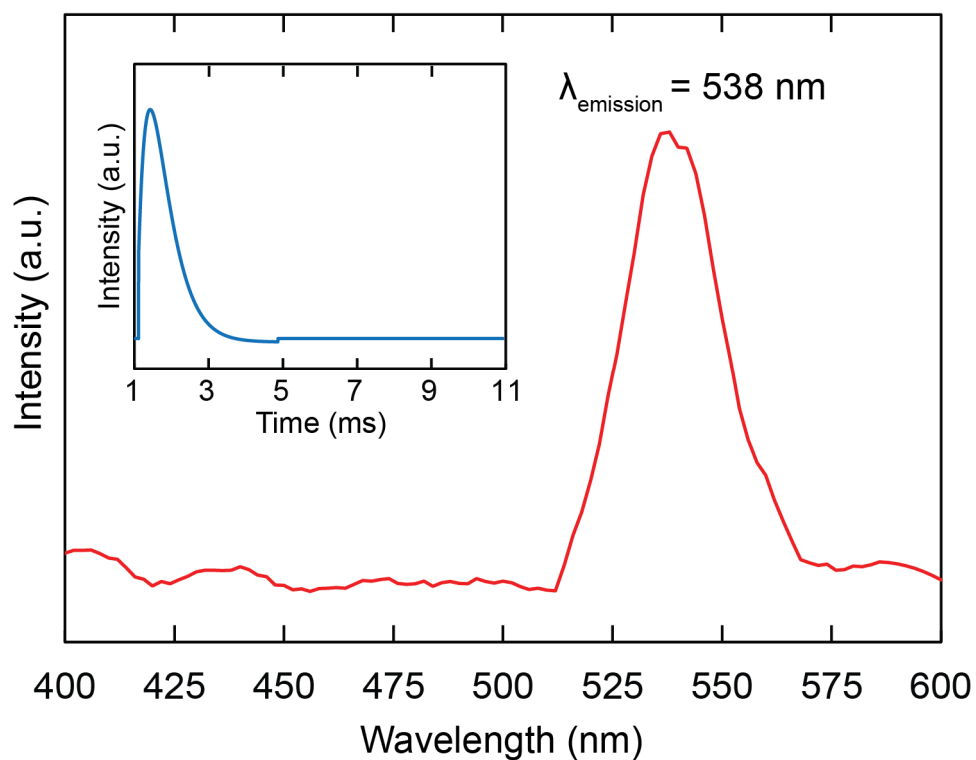

**Figure S7.** Photoluminescence spectra and time-resolved fluorescence decay traces (inset) were collected for HCMUE-1 material with an excitation wavelength of 270 nm.



## Section S7. Photocatalytic kinetic model for the Cr(VI) reduction

**Photoreduction kinetic.** The pseudo-first-order kinetic are utilized to determine the photoreduction rate of Cr(VI), which is displayed by the eqn:

$$\ln\left(\frac{C_t}{C_o}\right) = -k_1t$$

Where  $C_t$  and  $C_o$  are the Cr(VI) concentration at  $t$  and original time,  $k_1$  are the rate constant of pseudo-first-order.

**Table S1.** The Cr(VI) photoreduction efficiency of HCMUE-1 in comparison with other previously reported materials

| Material                                                 | Dosage of catalyst (g L <sup>-1</sup> ) | Initial concentration (mg L <sup>-1</sup> ) | Light source         | Overall degradation efficiency (%) | Time (min) | Ref.       |
|----------------------------------------------------------|-----------------------------------------|---------------------------------------------|----------------------|------------------------------------|------------|------------|
| SrTiO <sub>3</sub>                                       | 1.0                                     | 4.8                                         | Visible light        | 99                                 | 240        | [1]        |
| Fe-g-C <sub>3</sub> N <sub>4</sub> /MoS <sub>2</sub>     | 0.6                                     | 9.6                                         | Visible light        | 91.4                               | 150        | [2]        |
| OH-TiO <sub>2</sub>                                      | 1.0                                     | 10                                          | Visible light        | 88                                 | 30         | [3]        |
| Ag-BiOCl                                                 | 1.0                                     | 10                                          | Visible light        | 86                                 | 180        | [4]        |
| NNU-36                                                   | 0.375                                   | 10                                          | Visible light        | 95.3                               | 60         | [5]        |
| MIL-53(Fe)                                               | 1.0                                     | 20                                          | Visible light        | 66                                 | 40         | [6]        |
| Ag/AgCl@MIL-53(Fe)                                       | 0.4                                     | 10                                          | Visible light        | 99.4                               | 240        | [7]        |
| Pt@MIL-100(Fe)                                           | 1.0                                     | 20                                          | Visible light        | 100                                | 8          | [8]        |
| MIL-68(In)-NH <sub>2</sub>                               | 1.0                                     | 20                                          | Visible light        | 97                                 | 80         | [9]        |
| g-C <sub>3</sub> N <sub>4</sub> /UiO-66                  | 0.5                                     | 10                                          | White light          | 99                                 | 40         | [10]       |
| UiO-66-NH <sub>2</sub> (Zr)                              | 0.5                                     | 5                                           | Sunlight             | 98                                 | 120        | [11]       |
| UiO-66(OH) <sub>2</sub>                                  | 0.2                                     | 8                                           | Visible light        | 100                                | 10         | [12]       |
| RGO-UiO-66(NH <sub>2</sub> )                             | 0.5                                     | 10                                          | Visible light        | 100                                | 100        | [13]       |
| MIL-53-NH <sub>2</sub>                                   | 0.5                                     | 8                                           | Visible light        | 15                                 | 60         | [14]       |
| MIL-53/WO <sub>3</sub>                                   | 1.0                                     | 45                                          | Sun light            | 94                                 | 240        | [15]       |
| MIL-101-NH <sub>2</sub> /g-C <sub>3</sub> N <sub>4</sub> | 1.0                                     | 20                                          | Sun light            | 66                                 | 90         | [16]       |
| MIL-100/Bi <sub>12</sub> O <sub>17</sub> C <sub>12</sub> | 0.5                                     | 10                                          | Visible light        | 99.2                               | 120        | [17]       |
| DUT-52                                                   | 0.2                                     | 20                                          | Visible light        | 30                                 | 120        | This study |
| <b>HCMUE-1</b>                                           | <b>0.2</b>                              | <b>10</b>                                   | <b>Visible light</b> | <b>100</b>                         | <b>30</b>  |            |
|                                                          | <b>0.2</b>                              | <b>20</b>                                   | <b>Visible light</b> | <b>98</b>                          | <b>90</b>  |            |
|                                                          | <b>0.2</b>                              | <b>20</b>                                   | <b>Visible light</b> | <b>100</b>                         | <b>120</b> |            |

## References

- [1] D. Yang, Y. Sun, Z. Tong, Y. Nan and Z. Jiang, Fabrication of bimodal-pore SrTiO<sub>3</sub> microspheres with excellent photocatalytic performance for Cr(VI) reduction under simulated sunlight, *J. Hazard. Mater.*, 2016, **312**, 45-54.
- [2] X. Wang, M. Hong, F. Zhang, Z. Zhuang and Y. Yu, Recyclable nanoscale zero valent iron doped g-C<sub>3</sub>N<sub>4</sub>/MoS<sub>2</sub> for efficient photocatalysis of RhB and Cr(VI) driven by visible light, *ACS Sustain. Chem. Eng.*, 2016, **4**, 4055-4063.
- [3] Y. Li, Y. Bian, H. Qin, Y. Zhang and Z. Bian, Photocatalytic reduction behavior of hexavalent chromium on hydroxyl modified titanium dioxide, *Appl. Catal. B: Environ.*, 2017, **206**, 293-299.
- [4] H. Li and L. Zhang, Oxygen vacancy induced selective silver deposition on the {001} facets of BiOCl single-crystalline nanosheets for enhanced Cr(VI) and sodium pentachlorophenate removal under visible light, *Nanoscale*, 2014, **6**, 7805-7810.
- [5] H. Zhao, Q. Xia, H. Xing, D. Chen and H. Wang, Construction of pillared-layer MOF as efficient visible-light photocatalysts for aqueous Cr(VI) reduction and dye degradation, *ACS Sustain. Chem. Eng.*, 2017, **5**, 4449-4456.
- [6] R. Liang, F. Jing, L. Shen, N. Qin and L. Wu, MIL-53(Fe) as a highly efficient bifunctional photocatalyst for the simultaneous reduction of Cr(VI) and oxidation of dyes, *J. Hazard. Mater.*, 2015, **287**, 364-372.
- [7] Q. Liu, C. Zeng, L. Ai, Z. Hao and J. Jiang, Boosting visible light photoreactivity of photoactive metal-organic framework: Designed plasmonic Z-scheme Ag/AgCl@MIL-53-Fe, *Appl. Catal. B: Environ.*, 2018, **224**, 38-45.
- [8] R. Liang, F. Jing, L. Shen, N. Qin and L. Wu, M@MIL-100(Fe) (M = Au, Pd, Pt) nanocomposites fabricated by a facile photodeposition process: Efficient visible-light photocatalysts for redox reactions in water, *Nano Res.*, 2015, **8**, 3237-3249.
- [9] R. Liang, R. Huang, X. Wang, S. Ying, G. Yan and L. Wu, Functionalized MIL-68(In) for the photocatalytic treatment of Cr(VI)-containing simulation wastewater: Electronic effects of ligand substitution, *Appl. Surf. Sci.*, 2019, **464**, 396-403.
- [10] X.-H. Yi, S.-Q. Ma, X.-D. Du, C. Zhao, H. Fu, P. Wang and C.-C. Wang, The facile fabrication of 2D/3D Z-scheme g-C<sub>3</sub>N<sub>4</sub>/UiO-66 heterojunction with enhanced photocatalytic Cr(VI) reduction performance under white light, *Chem. Eng. J.*, 2019, **375**, 121944.
- [11] X. -D. Du, X. -H. Yi, P. Wang, W. Zheng, J. Deng and C. -C. Wang, Robust photocatalytic reduction of Cr(VI) on UiO-66-NH<sub>2</sub>(Zr/Hf) metalorganic framework membrane under sunlight

irradiation, *Chem. Eng. J.*, 2019, **356**, 393-399.

[12] H. Xie, D. Ma, W. Liu, Q. Chen, Y. Zhang, J. Huang, H. Zhang, Z. Jin, T. Luo and F. Peng, Zr-based MOFs as a new photocatalysts for rapid reduction of Cr(VI) in water, *New J. Chem.*, 2020, **44**, 7218-7225.

[13] L. Shen, L. Huang, S. Liang, R. Liang, N. Qin and L. Wu, Electrostatically derived self-assembly of NH<sub>2</sub>-mediated zirconium MOFs with graphene for photocatalytic reduction of Cr(VI), *RSC Adv.*, 2014, **4**, 2546-2549.

[14] L. Shi, T. Wang, H. Zhang, K. Chang, X. Meng, H. Liu and J. Ye, An amine-functionalized iron(III) metal-organic framework as efficient visible-light photocatalyst for Cr(VI) reduction, *Adv. Sci.*, 2015, **2**, 1500006.

[15] A. A. Oladipo, MIL-53(Fe)-based photo-sensitive composite for degradation of organochlorinated herbicide and enhanced reduction of Cr(VI), *Process Saf. Environ. Prot.*, 2018, **116**, 413-423.

[16] D. Pattappan, K. V. Kavya, S. Vargheese, R. T. R. Kumar and Y. Haldorai, Graphitic carbon nitride/NH<sub>2</sub>-MIL-101(Fe) composite for environmental remediation: visible-light-assisted photocatalytic degradation of acetaminophen and reduction of hexavalent chromium, *Chemosphere*, 2022, **286**, 131875.

[17] Li, H.; Zhao, C.; Li, X.; Fu, H.; Wang, Z.; Wang, C. -C. Boosted photocatalytic Cr(VI) reduction over Z-scheme MIL-53(Fe)/Bi<sub>12</sub>O<sub>17</sub>Cl<sub>2</sub> composites under white light, *J. Alloy. Compd.*, 2020, **844**, 156147.
